# Supplementary material for: Controls on leaf water hydrogen and oxygen isotopes: A local investigation across seasons and altitude
Source: Copernicus journal article supplement (doi:10.5194/hess-2022-246), 2022-07-07
Supplement: Supplementary file 1 [file hess-2022-246-supplement.pdf]

## Supplementary Figures

**Supplementary Table S1** Boxplots of precipitation, soil water, stem water, and leaf water for  $\delta^{18}\text{O}$  values (a-d) and  $\delta^2\text{H}$  values (e-h). Box plots show the median (red line), interquartile range (IQR) with the upper (75%) and lower (25%) quartiles, lowest whisker still within 1.5 IQR of the lower quartile, and highest whisker still within 1.5 IQR of the upper quartile; dots mark outliers.

**Supplementary Table S2** Dual isotope plots of precipitation, soil water, twig water, and leaf water in May (a), July (b), and September (c).

**Supplementary Table S3** Relationships between altitude and  $\delta^{18}\text{O}$  (a-c) and  $\delta^2\text{H}$  values (d-f) from different water types across months.

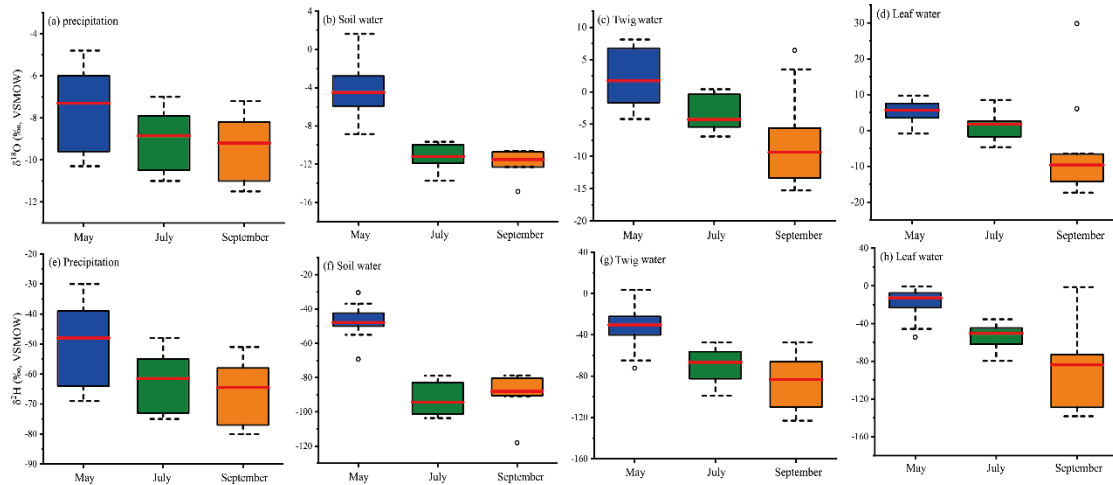

Supplementary Table S1

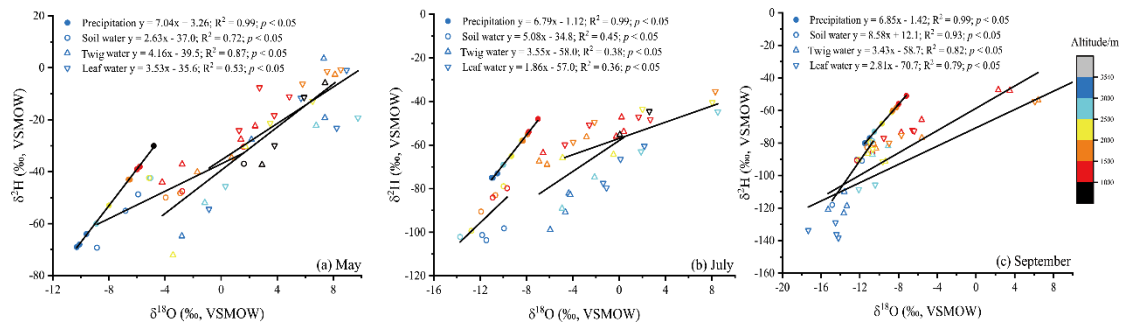

Supplementary Table S2

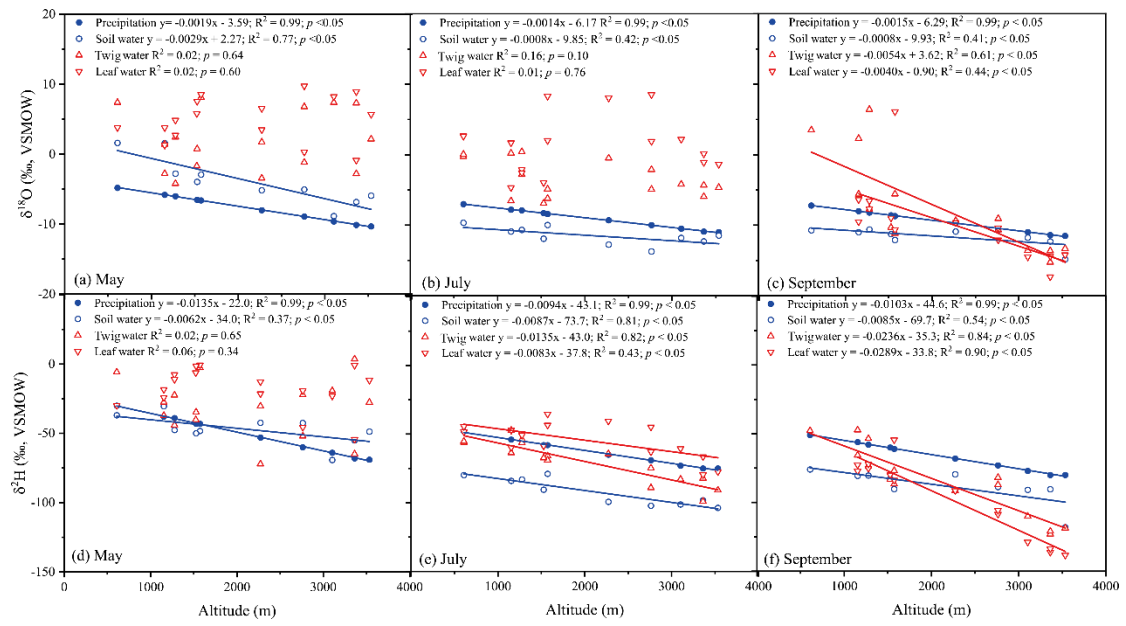

Supplementary Fig. S3
